# Supplementary material
Source: ML conference proceedings conference paper supplement (https://openreview.net/forum?id=NbkjMn7X8H)
Supplement: supplementary_material [file attachment]

---

# Supplementary Material to 'Robust Nonparametric Regression under Poisoning Attack'

---

Anonymous Author(s)

Affiliation

Address

email

1 In this supplementary material, section 1 shows our implementation of the corrected estimator. Other  
2 sections are proofs of the theoretical results.

## 3 1 Implementation of Corrected Estimator

4 The corrected estimation is

$$\hat{\eta}_c = \arg \min_{\|\nabla g\|_\infty \leq L} \|\hat{\eta}_0 - g\|_1. \quad (1)$$

5 In this section, we find a approximate numerical solution instead. In particular, we only optimize  $g$  at  
6 grid points that are dense enough, and the values elsewhere can be simply calculated via interpolation.  
7 The grid points are set to be  $\mathbf{x}_{j_1, \dots, j_d} = \mathbf{x}_0 + (j_1, \dots, j_d)a$ , with indices  $j_k \in \{1, \dots, m_k\}$ ,  $m_k$  is  
8 the grid count along  $k$ -th dimension.  $\mathbf{x}_0$  and  $m_k$  need to satisfy

$$x_{0k} \leq \inf_{\mathbf{x} \in \mathcal{X}} x_k, \quad (2)$$

$$x_{0k} + m_k a \geq \sup_{\mathbf{x} \in \mathcal{X}} x_k, \quad (3)$$

9 so that these grid points cover the whole support.  $a$  is the grid size. Denote  $\mathbf{j} = (j_1, \dots, j_d)$ ,  
10  $g_{\mathbf{j}} = g(\mathbf{x}_{\mathbf{j}})$ , and  $r_{\mathbf{j}} = \hat{\eta}_0(\mathbf{x}_{\mathbf{j}})$ . Then the discretized optimization problem can be formulated as  
11 following:

$$\underset{g}{\text{minimize}} \quad \sum_{\mathbf{j}} |g_{\mathbf{j}} - r_{\mathbf{j}}| \quad (4)$$

$$\text{subject to} \quad |g_{\mathbf{j}} - g_{\mathbf{j}'}| \leq La, \forall |\mathbf{j}' - \mathbf{j}| = 1,$$

12 in which  $|\mathbf{j}' - \mathbf{j}| = \sum_{k=1}^d |j'_k - j_k|$ . With sufficiently small  $a$ , the discretized problem approximates  
13 (1) well. (4) can be solved simply by optimizing each  $g_{\mathbf{j}}$  iteratively.

## 14 2 Proof of Theorem 1: $\ell_2$ Convergence of Initial Estimator

15 This section proves the convergence rate of the initial estimator

$$\hat{\eta}_0(\mathbf{x}) = \arg \min_{|s| \leq M} \sum_{i=1}^N K\left(\frac{\mathbf{x} - \mathbf{X}_i}{h}\right) \phi(Y_i - s). \quad (5)$$

16 To begin with, we use the following notations.

17 **Definition 1.** Define

$$B_h(\mathbf{x}) = \{\mathbf{u} \mid \|\mathbf{u} - \mathbf{x}\| < h\} \quad (6)$$

18 as the ball centering at  $\mathbf{x}$  with radius  $h$ ,

$$q_h(\mathbf{x}) = |\{i | i \in \mathcal{B}, \mathbf{X}_i \in B_h(\mathbf{x})\}| \quad (7)$$

19 as the number of attacked samples within  $B_h(\mathbf{x})$ ,

$$I_h(\mathbf{x}) = \{i | \mathbf{X}_i \in B_h(\mathbf{x})\} \quad (8)$$

20 as the set of the indices of all samples within  $B_h(\mathbf{x})$ , and

$$n_h(\mathbf{x}) = |I_h(\mathbf{x})| \quad (9)$$

21 as the total number of samples within  $B_h(\mathbf{x})$ .

22 **Definition 2.** Define  $a(\mathbf{x})$ ,  $b(\mathbf{x})$  as

$$a(\mathbf{x}) = \arg \min_{|s| \leq M} \sum_{i \in I_h(\mathbf{x})} K \left( \frac{\mathbf{x} - \mathbf{X}_i}{h} \right) \phi(\eta(\mathbf{X}_i) + W_i - s), \quad (10)$$

23

$$b(\mathbf{x}) = \arg \min_{|s| \leq M} \sum_{i \in I_h(\mathbf{x})} K \left( \frac{\mathbf{x} - \mathbf{X}_i}{h} \right) (\eta(\mathbf{X}_i) + W_i - s)^2, \quad (11)$$

24  $a(\mathbf{x})$  is the estimated value with no adversarial attacks.  $b(\mathbf{x})$  is just the ordinary kernel regression  
25 estimates clipped into  $[-M, M]$ . Then

$$|\hat{\eta}_0(\mathbf{x}) - \eta(\mathbf{x})| \leq |\hat{\eta}_0(\mathbf{x}) - a(\mathbf{x})| + |a(\mathbf{x}) - b(\mathbf{x})| + |b(\mathbf{x}) - \eta(\mathbf{x})|. \quad (12)$$

26 Note that  $a(\mathbf{x})$  and  $b(\mathbf{x})$  is not affected by the behavior of the attacker. Hence

$$\begin{aligned} R &= \mathbb{E} \left[ \sup_{\mathcal{A}} (\hat{\eta}_0(\mathbf{X}) - \eta(\mathbf{X}))^2 \right] \\ &\leq 3\mathbb{E} \left[ \sup_{\mathcal{A}} (\hat{\eta}_0(\mathbf{X}) - a(\mathbf{X}))^2 \right] + 3\mathbb{E} [(a(\mathbf{X}) - b(\mathbf{X}))^2] + 3\mathbb{E} [(b(\mathbf{X}) - \eta(\mathbf{X}))^2] \\ &:= 3(I_1 + I_2 + I_3), \end{aligned} \quad (13)$$

27 now we bound these three terms separately.

28 **Bound of  $I_1$ .** Define a new random variable

$$Z = 2Lh + \max_{i \in [N]} W_i - \min_{i \in [N]} W_i, \quad (14)$$

29 in which  $[N] = \{1, \dots, N\}$ . Then  $Z$  can be bounded using the following lemma.

30 **Lemma 1.** If  $t > 2Lh$ , then

$$P(Z > t) \leq 2 \exp \left[ - \min \left\{ \frac{(t - 2Lh)^2}{8\sigma^2}, \frac{t - 2Lh}{4\sigma} \right\} + \ln N \right], \quad (15)$$

31 and for  $t > 2Lh + 4\sigma \ln N$ ,

$$\mathbb{E}[Z^2 \mathbf{1}(Z > t)] \leq 2N(t^2 + 32\sigma^2 + 8t\sigma) e^{\frac{t-2Lh}{4\sigma}}. \quad (16)$$

32 Given  $Z$ ,  $|\hat{\eta}_0(\mathbf{x}) - a(\mathbf{x})|$  can be bounded. Define

$$r(\mathbf{x}) = \frac{C_K q_h(\mathbf{x})}{c_K (n_h(\mathbf{x}) - q_h(\mathbf{x}))}, \quad (17)$$

33 in which  $n_h$  is defined in (9), and

$$n_0 = \frac{1}{2} \alpha f_m v_d h^d N. \quad (18)$$

34 Then the following lemmas hold:

35 **Lemma 2.** If  $r(\mathbf{x}) \leq (T - Z)/(T + Z)$ , then  $|\hat{\eta}_0(\mathbf{x}) - a(\mathbf{x})| \leq (T + Z)r(\mathbf{x})$ .

36 **Lemma 3.** *Under the following three conditions:*

37 (a)  $n_h(\mathbf{x}) \geq n_0$ , in which  $v_d$  is the volume of  $d$  dimensional unit ball;

38 (b)  $Z \leq 2Lh + 8\sigma \ln N$ ;

39 (c)  $q_h(\mathbf{x}) \leq c_K n_0 / (3C_K + c_K)$ ,

40 then

$$|\hat{\eta}_0(\mathbf{x}) - a(\mathbf{x})| \leq \frac{2TC_K q_h(\mathbf{x})}{c_K n_0}. \quad (19)$$

41 Moreover, since  $|\hat{\eta}_0(\mathbf{x})| \leq M$ , and according to Assumption 1(b),  $|\eta(\mathbf{x})| \leq M$ ,  $|\hat{\eta}_0(\mathbf{x})| \leq 2M$   
 42 always hold, regardless of whether the conditions (a)-(c) in Lemma 3 are satisfied. Therefore

$$\begin{aligned} I_1 &= \mathbb{E} \left[ \sup_{\mathcal{A}} (\hat{\eta}_0(\mathbf{X}) - a(\mathbf{X}))^2 \right] \\ &= \mathbb{E} \left[ \sup_{\mathcal{A}} \int (\hat{\eta}_0(\mathbf{x}) - a(\mathbf{x}))^2 f(\mathbf{x}) d\mathbf{x} \right] \\ &\leq \frac{4C_K^2 T^2}{c_K^2 n_0^2} f_M \sup_{\mathcal{A}} \int q_h^2(\mathbf{x}) d\mathbf{x} + 4M^2 [\mathbb{P}(n_h(\mathbf{x}) < n_0) + \mathbb{P}(Z > 2Lh + 8\sigma \ln N) \\ &\quad + \sup_{\mathcal{A}} \mathbb{P} \left( q_h(\mathbf{X}) > \frac{c_K}{3C_K + c_K} n_0 \right)]. \end{aligned} \quad (20)$$

43 Now we bound each term separately. For the third term in (20),

$$\begin{aligned} \sup_{\mathcal{A}} \int q_h^2(\mathbf{x}) d\mathbf{x} &\leq \sup_{\mathcal{A}} \int \left( \sum_{i \in \mathcal{B}} \mathbf{1}(\|\mathbf{x} - \mathbf{X}_i\| < h) \right)^2 d\mathbf{x} \\ &\leq |\mathcal{B}| \sup_{\mathcal{A}} \int \sum_{i \in \mathcal{B}} \mathbf{1}(\|\mathbf{x} - \mathbf{X}_i\| < h) d\mathbf{x} \\ &= |\mathcal{B}|^2 v_d h^d = q^2 v_d h^d; \end{aligned} \quad (21)$$

44 For the second term in (20), since  $\mathbb{E}[n_h(\mathbf{x})] \geq f_m \alpha v_d h^d N = 2n_0$ ,

$$\mathbb{P}(n_h(\mathbf{x}) < n_0) \leq e^{-(1-\ln 2)n_0}. \quad (22)$$

45 Assumption 3 requires  $h > \ln^2 N / N$ . Recall (18),  $n_0 \sim N h^d \gtrsim \ln^2 N$ , thus (22) decays faster than  
 46 any polynomial of  $n_0$ . For the third term in (20), from Lemma 1,

$$\mathbb{P}(Z > 2Lh + 8\sigma \ln N) \leq \frac{2}{N}; \quad (23)$$

47 Finally, for the last term in (20),

$$\mathbb{P} \left( q_h(\mathbf{X}) > \frac{c_K}{3C_K + c_K} n_0 \right) \leq \frac{\mathbb{E}[q_h^2(\mathbf{X})]}{\left( \frac{c_K}{3C_K + c_K} n_0 \right)^2} \leq \frac{(3C_K + c_K)^2 f_M}{c_K^2 n_0^2} \int q_h^2(\mathbf{x}) d\mathbf{x} \lesssim \frac{q^2 h^d}{n_0^2}. \quad (24)$$

48 Therefore

$$I_1 \lesssim \frac{T^2 q^2 h^d}{n_0^2} + e^{-(1-\ln 2)n_0} + \frac{2}{N} + \frac{q^2 h^d}{n_0} \lesssim \frac{T^2 q^2}{N^2 h^d}. \quad (25)$$

49 **Bound of  $I_2$ .**

50 **Lemma 4.** *If  $Z \leq T$ , then  $a(\mathbf{x}) - b(\mathbf{x}) = 0$ .*

51 Lemma 4 will also be used later in other theorems.

*Proof.*

$$\max_{i \in I_h(\mathbf{x})} (\eta(\mathbf{X}_i) + W_i) - \min_{i \in I_h(\mathbf{x})} (\eta(\mathbf{X}_i) + W_i) \leq T. \quad (26)$$

52 Therefore  $\phi(\eta(\mathbf{X})_i + W_i - s) = (\eta(\mathbf{X}_i) + W_i - s)^2$  for  $\min_{i \in I_h(\mathbf{x})} (\eta(\mathbf{X}_i) + W_i) \leq s \leq \max_{i \in I_h(\mathbf{x})} (\eta(\mathbf{X}_i) +$   
 53  $W_i)$ . From (10) and 11,  $a(\mathbf{x}) - b(\mathbf{x}) = 0$ .  $\square$

54 If  $Z > T$ , (10) and (11) gives  $|a(\mathbf{x}) - b(\mathbf{x})| \leq 2M$ . Therefore, from Lemma 1,

$$I_2 = \mathbb{E}[(a(\mathbf{X}) - b(\mathbf{X}))^2] \leq 4M^2 \mathbb{P}(Z > T) \leq \frac{8M^2}{N^3}. \quad (27)$$

55 **Bound of  $I_3$ .** Since  $W_i$  is sub-exponential, it is straightforward to show that the variance is bounded  
56 by  $\sigma^2$ :

$$\mathbb{E}[W_i^2] = \mathbb{E} \left[ \lim_{\lambda \rightarrow 0} \frac{2}{\lambda^2} (e^{\lambda W_i} - 1 - \lambda W_i) \right] \leq \liminf_{\lambda \rightarrow 0} \frac{2}{\lambda^2} (e^{\frac{1}{2}\sigma^2 \lambda^2} - 1) = \sigma^2, \quad (28)$$

57 in which we used Fatou's lemma in the second step. Then  $I_3$  can simply be bounded by standard  
58 analysis of kernel regression [4, 5, 1]. For the completeness of the paper, we provide a brief proof  
59 here.

60 If  $n_h(\mathbf{x}) \geq n_0$ , in which  $n_0$  is defined in (18), then with the Lipschitz assumption (Assumption 1(a)),

$$\begin{aligned} |b(\mathbf{x}) - \eta(\mathbf{x})| &\leq \left| \frac{\sum_{i \in I_h(\mathbf{x})} K\left(\frac{\mathbf{x} - \mathbf{X}_i}{h}\right) (\eta(\mathbf{X}_i) - \eta(\mathbf{x}))}{\sum_{i \in I_h(\mathbf{x})} K\left(\frac{\mathbf{x} - \mathbf{X}_i}{h}\right)} \right| + \left| \frac{\sum_{i \in I_h(\mathbf{x})} K\left(\frac{\mathbf{x} - \mathbf{X}_i}{h}\right) W_i}{\sum_{i \in I_h(\mathbf{x})} K\left(\frac{\mathbf{x} - \mathbf{X}_i}{h}\right)} \right| \\ &\leq Lh + \frac{1}{n_0 c_K} \left| \sum_{i \in I_h(\mathbf{x})} K\left(\frac{\mathbf{x} - \mathbf{X}_i}{h}\right) W_i \right|. \end{aligned} \quad (29)$$

61 If  $n_h(\mathbf{x}) < n_0$ , then  $|b(\mathbf{x}) - \eta(\mathbf{x})| \leq 2M$ . Since  $\mathbb{E}[W_i] = 0$ ,  $\mathbb{E}[W_i^2] \leq \sigma^2$ ,

$$\mathbb{E}[(b(\mathbf{x}) - \eta(\mathbf{x}))^2] \leq L^2 h^2 + \frac{\sigma^2 C_K^2}{n_0 c_K^2} + 4M^2 \mathbb{P}(n_h(\mathbf{x}) < n_0). \quad (30)$$

62 Using (22), integrate (30) over the whole support,

$$I_3 \lesssim h^2 + \frac{1}{n_0} \sim h^2 + \frac{1}{N h^d}. \quad (31)$$

63 Combine (13), (25), (27) and (31),

$$R \lesssim \frac{T^2 q^2}{N^2 h^d} + h^2 + \frac{1}{N h^d}. \quad (32)$$

### 64 **3 Proof of Theorem 2: $\ell_\infty$ Convergence of Initial Estimator**

65 In the following proof, we assume that

$$h > \left( \frac{2(3C_K + c_K)q}{c_K \alpha f_m v_d N} \right)^{\frac{1}{d}}. \quad (33)$$

66 If (33) does not hold, then  $q/(N h^d) \gtrsim 1$ . Since  $|\hat{\eta}_0(\mathbf{x})| \leq M$  always hold, we have

$$|\hat{\eta}_0(\mathbf{x}) - \eta(\mathbf{x})| \leq 2M \lesssim \frac{q}{N h^d} \lesssim \frac{Tq}{N h^d} + h + \frac{\ln N}{\sqrt{N h^d}}, \quad (34)$$

67 thus Theorem 2 is proved trivially. From now on, assume (33) holds.

68 To begin with, define event  $E$ , which is true if all of the three conditions hold:

69 (1)  $\max_i W_i \leq 4\sigma \ln N$ ,  $\min_i W_i \geq -4\sigma \ln N$ ;

70 (2)  $n_0 \leq n_h(\mathbf{x}) \leq n_M$ ,  $\forall \mathbf{x} \in \mathcal{X}$ , in which  $n_0$  is defined in (18),  $n_h(\mathbf{x})$  is defined in (9), and

$$n_M = \frac{3}{2} N f_M v_d h^d; \quad (35)$$

71 (3) For all  $\mathbf{x} \in \mathcal{X}$  and any  $k \in \{1, \dots, N\}$ ,

$$\left| \sum_{i \in \mathcal{N}_k(\mathbf{x})} W_i \right| \leq \sigma \max\{\sqrt{k} \ln N, \ln^2 N\}, \quad (36)$$

in which  $\mathcal{N}_k(\mathbf{x})$  is the set of all samples among  $k$  nearest neighbors of  $\mathbf{x}$ . We remark that according to (14), (1) implies that  $Z \leq 2Lh + 8\sigma \ln N$ .

Denote the complement of  $E$  as  $E^c$ . Now we bound  $P(E^c)$ . From (83),  $P(\max_i W_i > 4\sigma \ln N) \leq 1/N$ . Similar bound holds for  $\min_i W_i$ . This bounds the probability of violating (1). (2) and (3) can be bounded using the following two lemmas:

**Lemma 5.** *For sufficiently large  $N$ , with probability at least  $1 - 1/N$ ,*

$$\inf_{\mathbf{x} \in \mathcal{X}} n_h(\mathbf{x}) \geq n_0, \quad (37)$$

$$\sup_{\mathbf{x} \in \mathcal{X}} n_h(\mathbf{x}) \leq n_M. \quad (38)$$

**Lemma 6.** *Let  $[N] = \{1, \dots, N\}$ . Then*

$$P\left(\exists \mathbf{x} \in \mathbf{X}, \exists k \in [N], \left| \sum_{i \in \mathcal{N}_k(\mathbf{x})} W_i \right| > \sigma \max\{\sqrt{k} \ln N, \ln^2 N\}\right) \leq 2dN^{2d+1} e^{-\frac{1}{2} \ln^2 N}. \quad (39)$$

Therefore

$$P(E^c) \leq \frac{3}{N} + 2dN^{2d+1} e^{-\frac{1}{2} \ln^2 N}. \quad (40)$$

Now we bound  $\ell_\infty$  error with the condition that  $E$  is true.

$$|\hat{\eta}_0(\mathbf{x}) - \eta(\mathbf{x})| \leq |\hat{\eta}_0(\mathbf{x}) - a(\mathbf{x})| + |a(\mathbf{x}) - b(\mathbf{x})| + |b(\mathbf{x}) - \eta(\mathbf{x})|. \quad (41)$$

**Bound of the first term in (41).** Under  $E$ , condition (a), (b) in Lemma 3 are satisfied. Moreover, from (33) and (18), condition (c) also hold. According to Lemma 3,

$$|\hat{\eta}_0(\mathbf{x}) - a(\mathbf{x})| \leq \frac{2TC_K q}{c_K n_0}. \quad (42)$$

**Bound of the second term in (41).** Recall that  $Z \leq 2Lh + 8\sigma \ln N < T$ , from Lemma 4,  $a(\mathbf{x}) - b(\mathbf{x}) = 0$ .

**Bound of the third term in (41).** We use the following additional lemma:

**Lemma 7.** *If  $E$  is true, then*

$$\left| \sum_{i=1}^N K\left(\frac{\mathbf{x} - \mathbf{X}_i}{h}\right) W_i \right| \leq C_K \sqrt{n_M} \ln N. \quad (43)$$

From (29) and Lemma 7,

$$|b(\mathbf{x}) - \eta(\mathbf{x})| \leq Lh + \frac{C_K}{n_0 c_K} \sqrt{n_M} \ln N. \quad (44)$$

Substitute these results into (41), and recall that  $n_0 \sim Nh^d$ ,  $n_M \sim Nh^d$ , under  $E$ ,

$$|\hat{\eta}_0(\mathbf{x}) - \eta(\mathbf{x})| \lesssim \frac{Tq}{Nh^d} + h + \frac{\ln N}{\sqrt{Nh^d}}, \quad (45)$$

Under  $E^c$ ,  $|\hat{\eta}_0(\mathbf{x}) - \eta(\mathbf{x})|$  can be bounded by  $2M$ , hence

$$\begin{aligned} \mathbb{E}[\|\hat{\eta}_0 - \eta\|] &\leq \mathbb{E}[\|\hat{\eta}_0 - \eta\| \mathbf{1}(E)] + 2MP(E^c) \\ &\lesssim \frac{Tq}{Nh^d} + h + \frac{\ln N}{\sqrt{Nh^d}}. \end{aligned} \quad (46)$$

The proof is complete.

## 91 4 Proof of Theorem 3: Minimax Convergence Rate

92 The proof begins with the following lemma.

93 **Lemma 8.** *Let  $p_1, p_2$  be the pdf of  $\mathcal{N}(\mu_1, \sigma^2)$  and  $\mathcal{N}(\mu_2, \sigma^2)$  respectively, with  $\mathcal{N}$  being the normal*  
 94 *distribution. Then there exists  $\alpha \in [0, |\mu_1 - \mu_2|/(2\sigma)]$  and two other pdfs  $q_1, q_2$ , such that*

$$(1 - \alpha)p_1 + \alpha q_1 = (1 - \alpha)p_2 + \alpha q_2. \quad (47)$$

95 *Proof.* Let

$$\begin{aligned} q_1 &= \frac{1 - \alpha}{\alpha}(p_2 - p_1)\mathbf{1}(p_2 \geq p_1), \\ q_2 &= \frac{1 - \alpha}{\alpha}(p_1 - p_2)\mathbf{1}(p_2 < p_1, ) \end{aligned} \quad (48)$$

96 then (47) holds. Note that  $q_1$  and  $q_2$  need to be normalized:

$$\begin{aligned} \int q_1(u)du &= \frac{1 - \alpha}{\alpha} \int (p_2(u) - p_1(u))\mathbf{1}(p_2(u) \geq p_1(u))du \\ &= \frac{1 - \alpha}{\alpha} \mathbb{T}\mathbb{V}(p_1, p_2), \end{aligned} \quad (49)$$

97 in which  $\mathbb{T}\mathbb{V}$  is the total variation distance. Hence (47) can be achieved with

$$\alpha = \frac{\mathbb{T}\mathbb{V}(p_1, p_2)}{1 + \mathbb{T}\mathbb{V}(p_1, p_2)}. \quad (50)$$

98 From Pinsker's inequality,

$$\mathbb{T}\mathbb{V}(p_1, p_2) \leq \sqrt{\frac{1}{2}D_{KL}(p_1||p_2)} = \frac{|\mu_1 - \mu_2|}{2\sigma}. \quad (51)$$

99 With (50) and (51), the proof is complete.  $\square$

100 Let

$$\eta_1(\mathbf{x}) = 0, \quad (52)$$

$$\eta_2(\mathbf{x}) = L \max\{r - \|\mathbf{x}\|, 0\}, \quad (53)$$

101 in which

$$r = \left( \frac{\sigma(d+1)q}{f_m L v_d N} \right)^{\frac{1}{d+1}}. \quad (54)$$

102 Let  $\eta \in \{\eta_1, \eta_2\}$ . Furthermore, assume that the noise variables are Gaussian, i.e.  $W_i \sim \mathcal{N}(0, \sigma^2)$ .  
 103 Assume  $f = f_m$  for  $\mathbf{x} \in \mathcal{X}$ . Design the attack strategy as following: go through all samples from  
 104  $i = 1$  to  $N$ , and initialize  $|\mathcal{B}_0| = \emptyset$ , then

105 (1) If  $\|\mathbf{X}_i\| > r$ , do not attack;

106 (2) If  $\|\mathbf{X}_i\| \leq r$ , then find  $\alpha_i, q_{i1}, q_{i2}$  such that  $(1 - \alpha_i)p_{i1} + \alpha_i q_{i1} = (1 - \alpha_i)p_{i2} + \alpha_i q_{i2}$ , in which  $p_{i1},$   
 107  $p_{i2}$  is the pdf of  $\mathcal{N}(\eta_1(\mathbf{X}_i), \sigma^2)$  and  $\mathcal{N}(\eta_2(\mathbf{X}_i), \sigma^2)$ , respectively. With probability  $\alpha_i$ , incorporate  
 108 sample  $i$  into  $\mathcal{B}_0$ ;

109 (3) Repeat (1), (2) for  $i = 1, \dots, N$ ;

110 (4) If  $|\mathcal{B}_0| \leq q$ , then attack all samples in  $\mathcal{B}_0$ . Otherwise, pick  $q$  samples randomly from  $\mathcal{B}_0$  to attack.  
 111 For each attacked sample  $i \in \mathcal{B}_0$ , let it follow distribution  $q_1$  if  $\eta = \eta_1$  and  $q_2$  if  $\eta = \eta_2$ .

112 Use Lemma 8, and denote  $s_d$  as the  $d - 1$  dimensional surface area of a  $d$  dimensional unit ball.  
 113  $s_d = dv_d$ . Then

$$\begin{aligned}
 \mathbb{P}(i \in \mathcal{B}_0) &\leq \int f(\mathbf{x}) \frac{|\eta_2(\mathbf{x}) - \eta_1(\mathbf{x})|}{2\sigma} d\mathbf{x} \\
 &= \frac{f_m L}{2\sigma} \int_{\|\mathbf{x}\| \leq r} (r - \|\mathbf{x}\|) d\mathbf{x} \\
 &= \frac{f_m L}{2\sigma} \int_0^r (r - u) s_d u^{d-1} du \\
 &= \frac{f_m L s_d}{2\sigma d(d+1)} r^{d+1} \\
 &= \frac{q}{2N}.
 \end{aligned} \tag{55}$$

114 From Chernoff inequality, it can be easily shown that  $\mathbb{P}(|\mathcal{B}_0| > q) \leq e^{-(\ln 2 - 1/2)q}$ . Therefore with  
 115 high probability, all samples in  $\mathcal{B}_0$  will be attacked, and the distribution of  $Y_i$  conditional on the  
 116 value of  $\mathbf{X}_i$  has no difference between  $\eta_1$  and  $\eta_2$ . This indicates that  $\eta_1$  and  $\eta_2$  are indistinguishable.  
 117 Therefore

$$\begin{aligned}
 \inf_{\hat{\eta}_0} \sup_{(f, \eta, \mathbb{P}_N) \in \mathcal{F}} \mathbb{E} \left[ \sup_{\mathcal{A}} (\hat{\eta}_0(\mathbf{X}) - \eta(\mathbf{X}))^2 \right] &\geq \inf_{\hat{\eta}_0} \sup_{\eta \in \{\eta_1, \eta_2\}} \mathbb{E} \left[ \sup_{\mathcal{A}} (\hat{\eta}_0(\mathbf{X}) - \eta(\mathbf{X}))^2 \right] \\
 &\geq (1 - \mathbb{P}(|\mathcal{B}_0| > q)) \frac{1}{4} \int (\eta_1(\mathbf{x}) - \eta_2(\mathbf{x}))^2 d\mathbf{x} \\
 &\geq \frac{1}{4} \left( 1 - e^{-(\ln 2 - \frac{1}{2})q} \right) L^2 \int_0^r (r - u)^2 s_d u^{d-1} du \\
 &\gtrsim r^{d+2} \\
 &\gtrsim \left( \frac{q}{N} \right)^{\frac{d+2}{d+1}},
 \end{aligned} \tag{56}$$

118 and similarly, the  $\ell_\infty$  error can be lower bounded by

$$\begin{aligned}
 \inf_{\hat{\eta}} \sup_{(f, \eta, \mathbb{P}_N) \in \mathcal{F}} \mathbb{E} \left[ \sup_{\mathcal{A}} \sup_{\mathbf{x}} |\hat{\eta}(\mathbf{x}) - \eta(\mathbf{x})| \right] &\geq \frac{1}{4} \left( 1 - e^{-(\ln 2 - \frac{1}{2})q} \right) Lr \\
 &\gtrsim r \\
 &\gtrsim \left( \frac{q}{N} \right)^{\frac{1}{d+1}}.
 \end{aligned} \tag{57}$$

119 Moreover, even if there are no adversarial samples, from standard minimax analysis [6], it can be  
 120 easily shown that

$$\inf_{\hat{\eta}_0} \sup_{(f, \eta, \mathbb{P}_N) \in \mathcal{F}} \mathbb{E} \left[ (\hat{\eta}_0(\mathbf{X}) - \eta(\mathbf{X}))^2 \right] \gtrsim N^{-\frac{2}{d+2}}, \tag{58}$$

121 and

$$\inf_{\hat{\eta}} \sup_{(f, \eta, \mathbb{P}_N) \in \mathcal{F}} \mathbb{E} \left[ \sup_{\mathcal{A}} \sup_{\mathbf{x}} |\hat{\eta}(\mathbf{x}) - \eta(\mathbf{x})| \right] \gtrsim N^{-\frac{1}{d+2}}. \tag{59}$$

122 Combine (56), (57), (58) and (59), the proof is complete.

## 123 5 Proof of Uniqueness of Corrected Estimator

124 Suppose that there are two solutions,  $g_1^*, g_2^*$ , such that  $g_1^*(\mathbf{x}) \neq g_2^*(\mathbf{x})$  for some  $\mathbf{x}$ , and

$$\|\hat{\eta}_0 - g_1^*\|_1 = \|\hat{\eta}_0 - g_2^*\| \leq \|\hat{\eta}_0 - g\|, \tag{60}$$

125 for any  $L$ -Lipschitz function  $g$ . Since  $g_1^*$  and  $g_2^*$  are Lipschitz continuous, there must be a compact  
 126 region around  $\mathbf{x}$  such that  $g_1^* \neq g_2^*$  everywhere in this region.

127 We first show that for all  $\mathbf{x}$  with  $g_1^*(\mathbf{x}) \neq g_2^*(\mathbf{x})$ ,

$$(\hat{\eta}_0(\mathbf{x}) - g_1^*(\mathbf{x}))(\hat{\eta}_0(\mathbf{x}) - g_2^*(\mathbf{x})) \geq 0. \quad (61)$$

128 Let  $g_a = (g_1^* + g_2^*)/2$ . If  $\hat{\eta}_0(\mathbf{x}) - g_1^*(\mathbf{x})$  and  $\hat{\eta}_0(\mathbf{x}) - g_2^*(\mathbf{x})$  have opposite sign, then

$$|g_a(\mathbf{x}) - \hat{\eta}_0(\mathbf{x})| < \frac{1}{2}(|g_1^*(\mathbf{x}) - \hat{\eta}_0(\mathbf{x})| + |g_2^*(\mathbf{x}) - \hat{\eta}_0(\mathbf{x})|), \quad (62)$$

129 thus  $\|g_a - \hat{\eta}_0\|_1 < (\|g_1^* - \hat{\eta}_0\|_1 + \|g_2^* - \hat{\eta}_0\|_1)$ , contradicts (60). Therefore (61) holds. This  
 130 indicates that the support  $\mathcal{X}$  can be divided into  $S_1$  and  $S_2$ , such that in  $\max\{g_1^*, g_2^*\} \leq \hat{\eta}_0$  within  
 131  $S_1$ ,  $\min\{g_1^*, g_2^*\} \geq \hat{\eta}_0$  within  $S_2$ .

132 Then let

$$g_b(\mathbf{x}) = \begin{cases} \max\{g_1^*(\mathbf{x}), g_2^*(\mathbf{x})\} & \text{if } x \in S_1 \\ \min\{g_1^*(\mathbf{x}), g_2^*(\mathbf{x})\} & \text{if } x \in S_2, \end{cases} \quad (63)$$

133 then it can be easily shown that  $g_b$  is Lipschitz and  $\|\hat{\eta}_0 - g\| < \max\{\|\hat{\eta}_0 - g_1^*\|, \|\hat{\eta}_0 - g_2^*\|\}$ ,  
 134 contradicts (60). The proof is complete.

## 135 6 Proof of Theorem 4: Convergence Rate of Corrected Estimator

136 Denote  $F[\eta]$  as the solution of the optimization problem

$$\begin{aligned} & \underset{g}{\text{minimize}} && \|\eta - g\|_1 \\ & \text{subject to} && \|\nabla g\|_\infty \leq L. \end{aligned} \quad (64)$$

137 Then the corrected estimate is  $\hat{\eta}_c = F[\hat{\eta}_0]$ , with  $\hat{\eta}_0$  being the initial estimate. The following lemma  
 138 holds:

139 **Lemma 9.** *For some  $\eta_1, \eta_2$ , If  $\eta_1(\mathbf{x}) \leq \eta_2(\mathbf{x}), \forall \mathbf{x} \in \mathcal{X}$ , then  $F[\eta_1](\mathbf{x}) \leq F[\eta_2](\mathbf{x}), \forall \mathbf{x} \in \mathcal{X}$ .*

140 Denote  $E$  as the event that  $\inf_x n_h(\mathbf{x}) \geq n_0$ ,  $\sup_x n_h(\mathbf{x}) \leq 3NfMv_d h^d/2$ , and  $Z \leq 2Lh + 8\sigma \ln N$ .

141 From Lemma 1,  $P(Z > 2Lh + 8\sigma \ln N) \leq 2/N$ . Combine with Lemma 5, the probability of  
 142 violating  $E$  can be bounded by

$$P(E^c) \leq \frac{3}{N}, \quad (65)$$

143 in which  $E^c$  is the complement of  $E$ .

144 In the following analysis, we bound the estimation error under the condition that  $E$  is true. We show  
 145 the following additional lemma:

**Lemma 10.**

$$P\left(\left|\sum_{i \in I_h(\mathbf{x})} K\left(\frac{\mathbf{x} - \mathbf{X}_i}{h}\right) W_i\right| > 3C_k \sigma \sqrt{Nf_M v_d h^d \ln N} \mid E\right) \leq \frac{2}{N^2}. \quad (66)$$

146 With these lemmas, we analyze the corrected estimator  $\hat{\eta}_c$  under  $E$ . To begin with,  $\hat{\eta}_0$  satisfies

$$|\hat{\eta}_0(\mathbf{x}) - \eta(\mathbf{x})| \leq |\hat{\eta}_0(\mathbf{x}) - a(\mathbf{x})| + |a(\mathbf{x}) - b(\mathbf{x})| + |b(\mathbf{x}) - \eta(\mathbf{x})|. \quad (67)$$

147 From Lemma 3, Under  $E$ ,

$$|\hat{\eta}_0(\mathbf{x}) - a(\mathbf{x})| \leq \frac{2TC_K q_h(\mathbf{x})}{c_K n_0} + 2M\mathbf{1}\left(q_h(\mathbf{x}) > \frac{c_k n_0}{3C_K + c_K}\right); \quad (68)$$

148 From Lemma 4, under  $E$ , and Assumption 3,  $Z \leq T/2$ , thus  $a(\mathbf{x}) - b(\mathbf{x}) = 0$ ;

149 From (29),

$$\begin{aligned} |b(\mathbf{x}) - \eta(\mathbf{x})| & \leq Lh + \frac{3C_K \sigma}{c_K n_0} \sqrt{Nf_M v_d h^d \ln N} \\ & \quad + 2M\mathbf{1}\left(\left|\sum_{i \in I_h(\mathbf{x})} K\left(\frac{\mathbf{x} - \mathbf{X}_i}{h}\right) W_i\right| > 3C_K \sigma \sqrt{Nf_M v_d h^d \ln N}\right). \end{aligned} \quad (69)$$



150 Define

$$S := \left\{ \mathbf{x} \mid \left| \sum_{i \in I_h(\mathbf{x})} K \left( \frac{\mathbf{x} - \mathbf{X}_i}{h} \right) W_i \right| > 3C_K \sigma \sqrt{N f_M v_d h^d \ln N} \right\}, \quad (70)$$

151

$$\delta(\mathbf{x}) := \frac{2TC_K q_h(\mathbf{x})}{c_K n_0} + Lh + 3C_K \sigma \sqrt{N f_M v_d h^d \ln N} + 2M \mathbf{1} \left( q_h(\mathbf{x}) > \frac{c_K n_0}{3C_K + c_K} \right) + 2M \mathbf{1}(\mathbf{x} \in S). \quad (71)$$

152 Therefore, under  $E$ ,  $|\hat{\eta}_0(\mathbf{x}) - \eta(\mathbf{x})| \leq \delta(\mathbf{x})$ . Furthermore, define

$$\eta_1(\mathbf{x}) := \eta(\mathbf{x}) - \delta(\mathbf{x}), \quad (72)$$

$$\eta_2(\mathbf{x}) := \eta(\mathbf{x}) + \delta(\mathbf{x}), \quad (73)$$

153 then  $\eta_1 \leq \hat{\eta}_0 \leq \eta_2$  under  $E$ . From Lemma 9,  $F[\eta_1] \leq F[\eta_0] \leq F[\eta_2]$ . The error of  $F[\eta_0]$  can be  
154 bounded by the error of  $F[\eta_1]$  and  $F[\eta_2]$ . Define

$$\Delta := Lh + 3C_K \sigma \sqrt{N f_M v_d h^d \ln N}. \quad (74)$$

155 The next lemma bounds  $\|F[\eta_1] - \eta\|_2^2$  and  $\|F[\eta_2] - \eta\|_2^2$ :

156 **Lemma 11.** Under  $E$ ,

$$\max \{ \|F[\eta_1] - \eta\|_2^2, \|F[\eta_2] - \eta\|_2^2 \} \lesssim \left( \frac{Tq}{N} \right)^{\frac{d+2}{d+1}} + h^2 + \frac{\ln N}{N h^d}. \quad (75)$$

157 Therefore

$$\|F[\hat{\eta}_0] - \eta\|_2^2 \lesssim \left( \frac{Tq}{N} \right)^{\frac{d+2}{d+1}} + h^2 + \frac{\ln N}{N h^d}. \quad (76)$$

158 The overall risk can be bounded by

$$\begin{aligned} \mathbb{E} \left[ \sup_{\mathcal{A}} (\hat{\eta}_c(\mathbf{X}) - \eta(\mathbf{X}))^2 \right] &\leq f_M \mathbb{E} \left[ \sup_{\mathcal{A}} \|\hat{\eta}_c - \eta\|_2^2 \mathbf{1}(E) \right] + 4M^2 \mathbf{P}(E^c) \\ &\lesssim \left( \frac{Tq}{N} \right)^{\frac{d+2}{d+1}} + h^2 + \frac{\ln N}{N h^d}. \end{aligned} \quad (77)$$

159 The proof of  $\ell_2$  bound is complete.

160 For the  $\ell_\infty$  bound, note that

$$\hat{\eta}_0 \leq \eta + \|\hat{\eta}_0 - \eta\|_\infty, \quad (78)$$

161 thus from Lemma 9,

$$\hat{\eta}_c = F[\hat{\eta}_0] \leq F[\eta + \|\hat{\eta}_0 - \eta\|_\infty] = \eta + \|\hat{\eta}_0 - \eta\|_\infty. \quad (79)$$

162 Similarly,

$$\hat{\eta}_c \geq \eta - \|\hat{\eta}_0 - \eta\|_\infty. \quad (80)$$

163 Hence

$$\|\hat{\eta}_c - \eta\|_\infty \leq \|\hat{\eta}_0 - \eta\|_\infty. \quad (81)$$

164 This indicates that the  $\ell_\infty$  error of the corrected estimator does not exceed the initial estimator.  
165 Therefore, Theorem 2 can be directly used here.

## 166 7 Proof of Lemmas

### 167 7.1 Proof of Lemma 1

168 **Proof of (15).** Recall Assumption 1(d). Let  $W_{max} = \max_i W_i$ ,  $W_{min} = \min_i W_i$  for  $i = 1, \dots, N$ .  
169 For  $|\lambda| \leq 1/\sigma$ ,

$$\mathbb{E}[e^{\lambda W_{max}}] \leq \sum_{i=1}^N \mathbb{E}[e^{\lambda W_i}] \leq N e^{\frac{1}{2} \lambda^2 \sigma^2}. \quad (82)$$

170 Then

$$\begin{aligned} \mathbb{P}(W_{max} > t) &\leq N \inf_{|\lambda| \leq 1/\sigma} e^{-\lambda t} e^{\frac{1}{2} \lambda^2 \sigma^2} \\ &\leq \exp \left[ -\min \left\{ \frac{t^2}{2\sigma^2}, \frac{t}{2\sigma} \right\} + \ln N \right]. \end{aligned} \quad (83)$$

171 Similar bound holds for  $W_{min}$ . Then

$$\begin{aligned} \mathbb{P}(W_{max} - W_{min} > t) &\leq \mathbb{P} \left( W_{max} > \frac{t}{2} \right) + \mathbb{P} \left( W_{min} < -\frac{t}{2} \right) \\ &\leq 2 \exp \left[ -\left\{ \frac{t^2}{8\sigma^2}, \frac{t}{4\sigma} \right\} + \ln N \right]. \end{aligned} \quad (84)$$

172 From (14),  $Z = W_{max} - W_{min} + 2Lh^\gamma$ , hence (15) holds.

173 **Proof of (16).**

$$\begin{aligned} \mathbb{E}[Z^2 \mathbf{1}(Z > t)] &\leq \int_0^{t^2} \mathbb{P}(Z > t) du + \int_{t^2}^\infty \mathbb{P}(Z > \sqrt{u}) du \\ &= t^2 \mathbb{P}(Z > t) + 2 \int_{t^2}^\infty \exp \left[ -\frac{\sqrt{u} - 2Lh^\gamma}{4\sigma} + \ln N \right] du \\ &\leq 2N(s^2 + 32\sigma^2 + 8s\sigma) e^{\frac{t - 2Lh^\gamma}{4\sigma}}. \end{aligned} \quad (85)$$

## 174 7.2 Proof of Lemma 2

175 We first discuss the case when

$$\sum_{i \in I_h(\mathbf{x})} K \left( \frac{\mathbf{x} - \mathbf{X}_i}{h} \right) \phi'(\eta(\mathbf{X}_i) + W_i - a(\mathbf{x})) = 0. \quad (86)$$

176 According to (10), this happens if the minimum value in (10) is reached within  $[-M, M]$ .

$$\begin{aligned} \left| \sum_{i \in I_h(\mathbf{x})} K \left( \frac{\mathbf{x} - \mathbf{X}_i}{h} \right) \phi'(Y_i - a(\mathbf{x})) \right| &= \left| \sum_{i \in I_h(\mathbf{x})} K \left( \frac{\mathbf{x} - \mathbf{X}_i}{h} \right) [\phi'(Y_i - a(\mathbf{x})) - \phi'(\eta(\mathbf{X}_i) + W_i - a(\mathbf{x}))] \right| \\ &\leq \sum_{i \in I_h(\mathbf{x})} K \left( \frac{\mathbf{x} - \mathbf{X}_i}{h} \right) |\phi'(Y_i - a(\mathbf{x})) - \phi'(\eta(\mathbf{X}_i) + W_i - a(\mathbf{x}))| \\ &\stackrel{(a)}{\leq} \sum_{i \in I_h(\mathbf{x}) \cap \mathcal{B}} K \left( \frac{\mathbf{x} - \mathbf{X}_i}{h} \right) |\phi'(Y_i - a(\mathbf{x})) - \phi'(\eta(\mathbf{X}_i) + W_i - a(\mathbf{x}))| \\ &\stackrel{(b)}{\leq} 2 \sum_{i \in I_h(\mathbf{x}) \cap \mathcal{B}} K \left( \frac{\mathbf{x} - \mathbf{X}_i}{h} \right) (T + Z) \\ &\stackrel{(c)}{\leq} 2(T + Z) C_K q_h(\mathbf{x}). \end{aligned} \quad (87)$$

177 For (a), recall that  $Y_i \neq \eta(\mathbf{X}_i) + W_i$  only for attacked sample. For (b), recall (10), we have

$$\min_{j \in I_h(\mathbf{x})} \eta(\mathbf{X}_j) + W_j \leq a(\mathbf{x}) \leq \max_{j \in I_h(\mathbf{x})} \eta(\mathbf{X}_j) + W_j, \quad (88)$$

178 therefore  $|\eta(\mathbf{x}) + W_i - a| \leq Z, \forall i \in I_h(\mathbf{x})$ . Recall that

$$\phi'(u) = \begin{cases} 2u & \text{if } |u| \leq T \\ 2T & \text{if } u > T \\ -2T & \text{if } u < -T, \end{cases} \quad (89)$$

179 thus  $|\phi'(\eta(\mathbf{X}_i) + W_i - a(\mathbf{x}))| \leq 2Z$ . (c) just uses Assumption 2.

Moreover, if  $\delta \leq T - Z$ ,

$$\begin{aligned}
& \sum_{i \in I_h(\mathbf{x})} K \left( \frac{\mathbf{x} - \mathbf{X}_i}{h} \right) [\phi'(Y_i - a(\mathbf{x})) - \phi'(Y_i - (a(\mathbf{x}) + \delta))] \\
& \geq 2\delta \sum_{i \in I_h(\mathbf{x})} K \left( \frac{\mathbf{x} - \mathbf{X}_i}{h} \right) \mathbf{1}(|Y_i - a(\mathbf{x})| < T, |Y_i - (a(\mathbf{x}) + \delta)| < T) \\
& \geq 2\delta c_K |I_h(\mathbf{x}) \setminus B| \\
& \geq 2\delta c_K (n_h(\mathbf{x}) - q_h(\mathbf{x})).
\end{aligned} \tag{90}$$

Similarly,

$$\sum_{i \in I_h(\mathbf{x})} K \left( \frac{\mathbf{x} - \mathbf{X}_i}{h} \right) [\phi'(Y_i - (a(\mathbf{x}) - \delta)) - \phi'(Y_i - a(\mathbf{x}))] \geq 2\delta c_K (n_h(\mathbf{x}) - q_h(\mathbf{x})). \tag{91}$$

Let  $\delta = (T + Z)r(\mathbf{x})$ , with condition  $r(\mathbf{x}) \leq (T - Z)/(T + Z)$ ,  $\delta \leq T - Z$ , thus (90) and (91) hold. From (87), (90) and (91),

$$\sum_{i \in I_h(\mathbf{x})} K \left( \frac{\mathbf{x} - \mathbf{X}_i}{h} \right) \phi'(Y_i - (a(\mathbf{x}) + \delta)) \leq 0 \leq \sum_{i \in I_h(\mathbf{x})} K \left( \frac{\mathbf{x} - \mathbf{X}_i}{h} \right) \phi'(Y_i - (a(\mathbf{x}) - \delta)). \tag{92}$$

Therefore  $\hat{\eta}_0(\mathbf{x}) \in [a - \delta, a + \delta]$ .

Now it remains to discuss the case when (86) is violated, which indicates that the minimum in (10) is not reached in  $[-M, M]$ . Then  $a(\mathbf{x}) = M$  or  $a(\mathbf{x}) = -M$ . If  $a(\mathbf{x}) = M$ ,

$$\sum_{i \in I_h(\mathbf{x})} K \left( \frac{\mathbf{x} - \mathbf{X}_i}{h} \right) \phi'(\eta(\mathbf{X}_i) + W_i - a(\mathbf{x})) > 0, \tag{93}$$

then go through (87),

$$\left| \sum_{i \in I_h(\mathbf{x})} K \left( \frac{\mathbf{x} - \mathbf{X}_i}{h} \right) \phi'(Y_i - a(\mathbf{x})) \right| > -2(T + Z)C_K q_h(\mathbf{x}). \tag{94}$$

With (91) and  $\delta = (T + Z)r(\mathbf{x})$ ,

$$\left| \sum_{i \in I_h(\mathbf{x})} K \left( \frac{\mathbf{x} - \mathbf{X}_i}{h} \right) \phi'(Y_i - (a(\mathbf{x}) - \delta)) \right| > 0. \tag{95}$$

Therefore  $\hat{\eta}_0(\mathbf{x}) \geq a(\mathbf{x}) - \delta$ , and from (5),  $\hat{\eta}_0(\mathbf{x}) \leq M$ . Therefore  $|\hat{\eta}_0(\mathbf{x}) - a(\mathbf{x})| \leq \delta$  still holds. Similar argument holds for  $a(\mathbf{x}) = -M$ . The proof is complete.

### 7.3 Proof of Lemma 3

From Assumption 3,  $T \geq 4Lh + 16\sigma \ln N$ , thus by condition (b) in Lemma 3,  $T \geq 2Z$ ,  $(T - Z)/(T + Z) \geq 1/3$ , and

$$r(\mathbf{x}) = \frac{C_K q_h(\mathbf{x})}{c_K (n_h(\mathbf{x}) - q_h(\mathbf{x}))} \leq \frac{C_K \frac{c_K}{3C_K + c_K} n_0}{c_K \left(1 - \frac{c_K}{3C_K + c_K}\right) n_0} = \frac{1}{3} \leq \frac{T - Z}{T + Z}. \tag{96}$$

Therefore from Lemma 2,

$$\begin{aligned}
|\hat{\eta}_0(\mathbf{x}) - a(\mathbf{x})| & \leq (T + Z)r(\mathbf{x}) \\
& \leq T \left(1 + \frac{1 - r(\mathbf{x})}{1 + r(\mathbf{x})}\right) r(\mathbf{x}) \\
& = \frac{2T}{\frac{1}{r(\mathbf{x})} + 1} \\
& \leq \frac{2TC_K q_h(\mathbf{x})}{c_K n_h(\mathbf{x})} \\
& \leq \frac{2TC_K q_h(\mathbf{x})}{c_K n_0}.
\end{aligned} \tag{97}$$

## 195 7.4 Proof of Lemma 5

196 Define

$$p_h(\mathbf{x}) = \int_{\|\mathbf{u}-\mathbf{x}\| \leq h} f(\mathbf{u}) d\mathbf{u} \quad (98)$$

197 as the probability mass of ball centering at  $\mathbf{x}$  with radius  $h$ .

198 **Lemma 12.** ([2], Lemma 3) with probability at least  $1 - 1/N$ , for all  $\mathbf{x} \in \mathcal{X}$ ,

$$\left| p_h(\mathbf{x}) - \frac{n_h(\mathbf{x})}{N} \right| \leq \beta_N \sqrt{p_h(\mathbf{x})} + \beta_N^2, \quad (99)$$

199 in which  $\beta_N = \sqrt{4(d+3) \ln(2N)/N}$ .

200 Assumption 3 requires that  $h \geq (\ln^2 N/N)^{1/d}$ , hence for sufficiently large  $N$ ,

$$\frac{\beta_N}{\sqrt{p_h(\mathbf{x})}} \leq \frac{\beta_N}{\sqrt{f_m \alpha v_d h^d}} = \sqrt{\frac{4(d+3) \ln(2N)}{f_m \alpha v_d h^d N}} \leq \frac{1}{3}, \quad (100)$$

201 and  $\beta_N^2/p_h(\mathbf{x}) \leq 1/9$ . Therefore

$$\left| p_h(\mathbf{x}) - \frac{n_h(\mathbf{x})}{N} \right| \leq p_h(\mathbf{x}) \left( \frac{\beta_N}{\sqrt{p_h(\mathbf{x})}} + \frac{\beta_N^2}{p_h(\mathbf{x})} \right) \leq \frac{4}{9} p_h(\mathbf{x}), \quad (101)$$

202 which yields

$$n_h(\mathbf{x}) \geq \frac{5}{9} N p_h(\mathbf{x}) > \frac{1}{2} N f_m \alpha v_d h^d = \frac{1}{2} n_0. \quad (102)$$

203 For the upper bound, not that  $p_h(\mathbf{x}) \leq f_M v_d h^d$ ,

$$n_h(\mathbf{x}) \leq \frac{13}{9} N p_h(\mathbf{x}) \leq \frac{3}{2} N f_M v_d h^d. \quad (103)$$

204 With probability at least  $1 - 1/N$ , (102) and (103) hold uniformly for all  $\mathbf{x} \in \mathcal{X}$ .

## 205 7.5 Proof of Lemma 6

206 For  $i, j \in [N]$ , let  $A_{ij}$  be a  $d-1$  dimensional hyperplane that perpendicularly bisects  $\mathbf{X}_i$  and  $\mathbf{X}_j$ .  
 207 The number of planes is  $N_p = N(N-1)/2$ . The number of regions divided by these planes can be  
 208 bounded by

$$N_r = \sum_{j=0}^d \binom{N_p}{j} \leq d N_p^d \leq d N^{2d}. \quad (104)$$

209 For all  $\mathbf{x}$  within a specific region, its nearest neighbors should be the same. Hence

$$|\{\mathcal{N}_k(\mathbf{x}) | \mathbf{x} \in \mathcal{X}, k \in [N]\}| \leq d N^{2d+1}. \quad (105)$$

210 Similar formulation was used in [3], proof of Lemma 3.

211 For each  $\mathcal{N}_k(\mathbf{x})$ , from Assumption 1(d), conditional on positions of  $\mathbf{X}_1, \dots, \mathbf{X}_N$

$$\mathbb{E} \left[ \exp \left( \lambda \sum_{i \in \mathcal{N}_k(\mathbf{x})} W_i \right) | \mathbf{X}^N \right] \leq e^{\frac{k}{2} \lambda^2 \sigma^2}, \forall \lambda \leq \frac{1}{\sigma}, \quad (106)$$

212 in which we use  $\mathbf{X}^N$  to substitute  $\mathbf{X}_1, \dots, \mathbf{X}_N$  for brevity. Then the following Chernoff bound holds:

$$\begin{aligned} \mathbb{P} \left( \sum_{i \in \mathcal{N}_k(\mathbf{x})} W_i > t | \mathbf{X}^N \right) &\leq \inf_{0 \leq \lambda \leq 1/\sigma} \exp \left( -\lambda t + \frac{k}{2} \lambda^2 \sigma^2 \right) \\ &\leq \begin{cases} e^{-\frac{t^2}{2k\sigma^2}} & \text{if } t \leq k\sigma \\ e^{-\frac{t}{2\sigma}} & \text{if } t > k\sigma. \end{cases} \end{aligned} \quad (107)$$

213 If  $t \geq \ln^2 N$ , let  $t = \sqrt{k}\sigma \ln N$ . Otherwise, let  $t = \sigma \ln^2 N$ . Then

$$\mathbf{P} \left( \sum_{i \in \mathcal{N}_k(\mathbf{x})} W_i > t | \mathbf{X}^N \right) \leq e^{-\frac{1}{2} \ln N}. \quad (108)$$

214 Combine with (105), the proof is complete.

## 215 7.6 Proof of Lemma 7

216 Recall that the statement of Theorem 2 requires that  $K(\mathbf{u})$  monotonic decrease with  $\|\mathbf{u}\|$ . Define

$$r_j := \sup \{ \|\mathbf{u}\| \mid K(\mathbf{u}) \geq c_K + j\Delta \}. \quad (109)$$

217 Cut  $K$  into  $m$  slices above  $c_K$ , whose heights are  $\Delta = (C_K - c_K)/m$ . Define the truncated kernel  
218 as

$$K_T(\mathbf{u}) := \sum_{j=1}^m \Delta \mathbf{1}(\|\mathbf{u}\| \leq r_j) + c_K \mathbf{1}(\|\mathbf{u}\| \leq 1), \quad (110)$$

219 then  $0 \leq K(\mathbf{u}) - K_T(\mathbf{u}) \leq \Delta$ , under  $E$ ,

$$\left| \sum_{i=1}^N \left( K \left( \frac{\mathbf{x} - \mathbf{X}_i}{h} \right) - K_T \left( \frac{\mathbf{x} - \mathbf{X}_i}{h} \right) \right) W_i \right| \leq \Delta \max_i |W_i| \leq 4\sigma \Delta \ln N, \quad (111)$$

220 and

$$\begin{aligned} \left| \sum_{i=1}^N K_T \left( \frac{\mathbf{x} - \mathbf{X}_i}{h} \right) W_i \right| &\leq \left| \sum_{i=1}^N c_K \mathbf{1}(\|\mathbf{x} - \mathbf{X}_i\| < h) W_i + \sum_{j=1}^m \sum_{i=1}^N \Delta \mathbf{1}(\|\mathbf{X}_i - \mathbf{x}\| \leq h r_j) W_i \right| \\ &\leq c_K \left| \sum_{i \in \mathcal{N}_{n_h}(\mathbf{x})} W_i \right| + \delta \sum_{j=1}^m \left| \sum_{i \in \mathcal{N}_{n_{hr_j}}(\mathbf{x})} W_i \right| \\ &\leq (c_K + m\Delta) \sqrt{n_M} \ln N \\ &= C_K \sqrt{n_M} \ln N. \end{aligned} \quad (112)$$

221 in which the last step uses Lemma 6. Since  $m$  can be arbitrarily large and  $\Delta$  can be arbitrarily small,  
222 from (111) and (112),

$$\left| \sum_{i=1}^N K \left( \frac{\mathbf{x} - \mathbf{X}_i}{h} \right) W_i \right| \leq C_K \sqrt{n_M} \ln N. \quad (113)$$

223 The proof is complete.

## 224 7.7 Proof of Lemma 9

225 Denote  $g_1 = F[\eta_1]$ ,  $g_2 = F[\eta_2]$ ,  $g = F[\eta]$ . If  $g_1 \leq g_2$  is not satisfied somewhere, then define

$$S = \{\mathbf{x} \mid g_1(\mathbf{x}) > g_2(\mathbf{x})\}. \quad (114)$$

226 Since  $g_1 = F(\eta_1)$ , due to the uniqueness of optimization solution (Proposition ??),  $\|\eta_1 - g_1\| <$   
227  $\|\eta_1 - g\|_1$  for all  $L$ -Lipschitz function  $g$ . Hence

$$\|\eta_1 - g_1\|_1 < \|\eta_1 - \min\{g_1, g_2\}\|_1, \quad (115)$$

228 thus

$$\int_S |\eta_1(\mathbf{x}) - g_1(\mathbf{x})| d\mathbf{x} < \int_S |\eta_1(\mathbf{x}) - g_2(\mathbf{x})| d\mathbf{x}. \quad (116)$$

229 In  $S$ ,  $g_2(\mathbf{x}) < g_1(\mathbf{x})$ , since  $\eta_2(\mathbf{x}) > \eta_1(\mathbf{x})$ ,

$$|\eta_2(\mathbf{x}) - g_2(\mathbf{x})| - |\eta_2(\mathbf{x}) - g_1(\mathbf{x})| \geq |\eta_1(\mathbf{x}) - g_2(\mathbf{x})| - |\eta_1(\mathbf{x}) - g_1(\mathbf{x})|. \quad (117)$$

230 Therefore

$$\int_S |\eta_2(\mathbf{x}) - g_1(\mathbf{x})| d\mathbf{x} < \int_S |\eta_2(\mathbf{x}) - g_2(\mathbf{x})| d\mathbf{x}, \quad (118)$$

231 which yields

$$\|\eta_2 - \min\{g_1, g_2\}\|_1 < \|\eta_2 - g_2\|, \quad (119)$$

232 contradict with that  $g_2 = F[\eta_2]$  is the solution of the optimization problem (64). Therefore  $g_1 \leq g_2$   
233 everywhere.

## 234 7.8 Proof of Lemma 10

235 According to Assumption 1(d), which requires that  $W_i$  is sub-exponential with parameter  $\sigma$ , we have

$$\mathbb{E} \left[ \exp \left[ \lambda \sum_{i \in I_h(\mathbf{x})} K \left( \frac{\mathbf{x} - \mathbf{X}_i}{h} \right) W_i \right] \middle| \mathbf{X}_1, \dots, \mathbf{X}_N \right] \leq \exp \left[ \frac{1}{2} \lambda^2 C_K^2 \sigma^2 n_h(\mathbf{x}) \right], \forall |\lambda| \leq \frac{1}{C_K \sigma} \quad (120)$$

236 and

$$\mathbb{P} \left( \sum_{i \in I_h(\mathbf{x})} K \left( \frac{\mathbf{x} - \mathbf{X}_i}{h} \right) W_i > t \middle| \mathbf{X}_1, \dots, \mathbf{X}_N \right) \leq \inf_{|\lambda| \leq 1/(C_K \sigma)} e^{-\lambda t + \lambda^2 C_K^2 \sigma^2 n_h(\mathbf{x})/2}. \quad (121)$$

237 Therefore for sufficiently large  $N$ , let  $t = 2C_K \sigma \sqrt{n_h(\mathbf{x}) \ln N}$ ,

$$\mathbb{P} \left( \sum_{i \in I_h(\mathbf{x})} K \left( \frac{\mathbf{x} - \mathbf{X}_i}{h} \right) W_i > 2C_K \sigma \sqrt{n_h(\mathbf{x}) \ln N} \middle| \mathbf{X}_1, \dots, \mathbf{X}_N \right) \leq e^{-2 \ln N} = \frac{1}{N^2}. \quad (122)$$

238 The opposite side can be proved similarly. Recall that under  $E$ ,  $n_h(\mathbf{x}) \leq 3N f_M v_d h^d/2$ . The proof  
239 is complete.

## 240 7.9 Proof of Lemma 11

241  $\eta$  is Lipschitz, thus  $\eta - \Delta$  is Lipschitz. Since  $F[\eta_1]$  is the solution of optimization problem (64) with  
242  $\eta_1$ , we have

$$\|\eta_1 - F[\eta_1]\|_1 \leq \|\eta_1 - (\eta - \Delta)\|_1. \quad (123)$$

243 Hence

$$\|F[\eta_1] - (\eta - \Delta)\|_1 \leq \|F[\eta_1] - \eta_1\|_1 + \|\eta_1 - (\eta - \Delta)\|_1 \leq 2\|\eta_1 - (\eta - \Delta)\|_1. \quad (124)$$

244 It remains to bound  $\|\eta_1 - (\eta - \Delta)\|_1$ :

$$\begin{aligned} \|\eta_1 - (\eta - \Delta)\|_1 &\leq \|Lh + 3C_K \sigma \sqrt{N f_M v_d h^d \ln N} - \Delta\|_1 \\ &\leq \frac{2TC_K}{c_K n_0} \int q_h(\mathbf{x}) d\mathbf{x} + 2M \int \mathbf{1} \left( q_h(\mathbf{x}) > \frac{c_K n_0}{3C_K + c_K} \right) d\mathbf{x} + 2M \int_S d\mathbf{x} \\ &\leq \frac{2TC_K q v_d h^d}{c_K n_0} + \frac{2M(3C_K + c_K) q v_d h^d}{c_K n_0} + 2M \int_S d\mathbf{x}. \end{aligned} \quad (125)$$

245  $\|\eta_2 - F[\eta_2]\|_1$  can be bounded in the same way. Therefore

$$\max \{ \|F[\eta_1] - (\eta - \Delta)\|_1, \|F[\eta_2] - (\eta + \Delta)\|_1 \} \leq (C_1 T + C_2) \frac{q h^d}{n_0} + 2M \int_S d\mathbf{x}, \quad (126)$$

246 in which  $C_1 = 4C_K v_d / c_K$ ,  $C_2 = 4M(3C_K + c_K) v_d / c_K$ . We then show the following lemma.

247 **Lemma 13.** *If a function  $g$  is  $L_d$ -Lipschitz with bounded  $\|g\|_1$ , then*

$$\|g\|_2^2 \lesssim \left( \frac{(d+1)d^{\frac{d}{2}} L^d}{v_d} \right)^{\frac{1}{d+1}} \|g\|_1^{\frac{d+2}{d+1}}. \quad (127)$$

248 *Proof.*  $g$  is continuous with bounded  $\|g\|_1$ , thus it reaches its maximum at some  $\mathbf{x}_0$ . Then

$$|g(\mathbf{x})| \geq \|g\|_\infty - L_d \|\mathbf{x} - \mathbf{x}_0\|, \forall \|\mathbf{x} - \mathbf{x}_0\| \leq \|g\|_\infty / L_d. \quad (128)$$

249 Denote  $s_d$  as the surface area of  $d$ -dimension unit ball,  $s_d = dv_d$ , then

$$\begin{aligned} \|g\|_1 &= \int |g(\mathbf{x})| d\mathbf{x} \\ &\geq \int_{\|\mathbf{x} - \mathbf{x}_0\| \leq \|g\|_\infty / L_d} (\|g\|_\infty - L_d \|\mathbf{x} - \mathbf{x}_0\|) d\mathbf{x} \\ &= \int_0^{\|g\|_\infty / L_d} (\|g\|_\infty - L_d r) s_d r^{d-1} dr \\ &= \frac{s_d}{d} \|g\|_\infty \left( \frac{\|g\|_\infty}{L_d} \right)^d - \frac{L_d s_d}{d+1} \left( \frac{\|g\|_\infty}{L_d} \right)^{d+1} \\ &= \frac{v_d}{(d+1)L_d^d} \|g\|_\infty^{d+1}. \end{aligned} \quad (129)$$

250 Hence

$$\|g\|_\infty \leq \left( \frac{(d+1)L_d^d}{v_d} \|g\|_1 \right)^{\frac{1}{d+1}}, \quad (130)$$

251

$$\|g\|_2^2 \leq \|g\|_1 \|g\|_\infty \leq \left( \frac{(d+1)L_d^d}{v_d} \right)^{\frac{1}{d+1}} \|g\|_1^{\frac{d+2}{d+1}}. \quad (131)$$

252

□

253 Moreover, in (64), the derivative of  $g$  is bounded by  $L$  in each dimension, hence  $F[\eta]$  is  $\sqrt{d}L$ -  
254 Lipschitz. Let  $L_d = \sqrt{d}L$ . Since  $\eta - \Delta$ ,  $F[\eta_1]$  are both  $L_d$ -Lipschitz,  $\eta - \Delta - F[\eta_1]$  is  $2L_d$ -Lipschitz,  
255 hence

$$\|F[\eta_1] - (\eta - \Delta)\|_2^2 \lesssim \left( \frac{Tqh^d}{n_0} \right)^{\frac{d+2}{d+1}} + \left( \int_S d\mathbf{x} \right)^{\frac{d+2}{d+1}}, \quad (132)$$

256 and

$$\begin{aligned} \|F[\eta_1] - \eta\|_2^2 &\leq 2\|F[\eta_1] - (\eta - \Delta)\|_2^2 + 2\Delta^2 \int_{\mathcal{X}} d\mathbf{x} \\ &\lesssim \left( \frac{Tqh^d}{n_0} \right)^{\frac{d+2}{d+1}} + \left( \int_S d\mathbf{x} \right)^{\frac{d+2}{d+1}} + h^2 + \frac{\ln N}{Nh^d}. \end{aligned} \quad (133)$$

257 From Lemma 10,

$$\mathbb{E} \left[ \int_S d\mathbf{x} \right] = \int_{\mathcal{X}} \mathbb{P}(\mathbf{x} \in S) d\mathbf{x} \leq \int_{\mathcal{X}} \frac{2}{N^2} d\mathbf{x} \leq \frac{2}{f_m N^2}, \quad (134)$$

258

$$\mathbb{E} \left[ \left( \int_S d\mathbf{x} \right)^{\frac{d+2}{d+1}} \right] \leq \mathbb{E} \left[ \int_S d\mathbf{x} \right] \left( \int_{\mathcal{X}} d\mathbf{x} \right)^{\frac{1}{d+1}} \leq \frac{1}{f_m^{\frac{1}{d+1}}} \mathbb{E} \left[ \int_S d\mathbf{x} \right] \lesssim \frac{1}{N^2}. \quad (135)$$

259 Therefore the second term in (133) decays faster than other terms, and

$$\begin{aligned} \|F[\eta_1] - \eta\|_2^2 &\leq 2\|F[\eta_1] - (\eta - \Delta)\|_2^2 + 2\Delta^2 \int_{\mathcal{X}} d\mathbf{x} \\ &\lesssim \left( \frac{Tqh^d}{n_0} \right)^{\frac{d+2}{d+1}} + h^2 + \frac{\ln N}{Nh^d}. \end{aligned} \quad (136)$$

260 The bound also holds for  $\|F[\eta_2] - \eta\|_2^2$ . Substitute  $n_0$  in (136) with (18). The proof is complete.

261 **References**

- 262 [1] Luc P Devroye. The uniform convergence of the nadaraya-watson regression function estimate.  
263 *Canadian Journal of Statistics*, 6(2):179–191, 1978.
- 264 [2] Heinrich Jiang. Uniform convergence rates for kernel density estimation. In *International*  
265 *Conference on Machine Learning*, pages 1694–1703. PMLR, 2017.
- 266 [3] Heinrich Jiang. Non-asymptotic uniform rates of consistency for k-nn regression. In *Proceedings*  
267 *of the AAAI Conference on Artificial Intelligence*, volume 33, pages 3999–4006, 2019.
- 268 [4] Adam Krzyzak. The rates of convergence of kernel regression estimates and classification rules.  
269 *IEEE Transactions on Information Theory*, 32(5):668–679, 1986.
- 270 [5] Yue-pok Mack and Bernard W Silverman. Weak and strong uniform consistency of kernel  
271 regression estimates. *Zeitschrift für Wahrscheinlichkeitstheorie und verwandte Gebiete*, 61:405–  
272 415, 1982.
- 273 [6] Alexandre B Tsybakov. *Introduction to Nonparametric Estimation*. Springer Series in Statistics,  
274 2009.
